# Supplementary material for: Quantifying wildfire drivers and predictability in boreal peatlands using a two-step error-correcting machine learning framework in TeFire v1.0
Source: Copernicus journal article supplement (doi:10.5194/gmd-17-1525-2024), 2024-02-21
Supplement: Supplementary file 1 [file gmd-17-1525-2024-supplement.pdf]

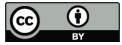

*Supplement of*

## **Quantifying wildfire drivers and predictability in boreal peatlands using a two-step error-correcting machine learning framework in TeFire v1.0**

**Rongyun Tang et al.**

*Correspondence to:* Mingzhou Jin ([jin@utk.edu](mailto:jin@utk.edu)) and Jiafu Mao ([maoj@ornl.gov](mailto:maoj@ornl.gov))

The copyright of individual parts of the supplement might differ from the article licence.



| Groups        | Variables                                      | Datasets                     | Time Span and Resolution        | Spatial Resolution  | Citations                                                  |
|---------------|------------------------------------------------|------------------------------|---------------------------------|---------------------|------------------------------------------------------------|
| Soil          | Soil moisture (SMroot and SMSurf)              | GLEAM v3.3a, v3.3b,<br>ECMWF | 1980-2018, monthly              | 0.5x0.5             | (Martens et al., 2017                                      |
| Socioeconomic | Northern Peatland<br>Population density (POPD) | Hugelius-2020<br>HYDE v3.2   | one period<br>10000BCE - 2015CE | 10km<br>0.083x0.083 | (Hugelius et al., 2020<br>(Klein Goldewijk et al.,<br>2017 |

## S1.2 Constructed Climate Variables

$$\text{Saturated vapor pressure}(SVP) = 6.112 \times e^{\frac{(22.46 + TMP)}{(272.62 + TMP)}}, \quad (S1)$$

$$\text{relative humidity}(HR) = \frac{VAP}{SAP} \times 100\%, \quad (S2)$$

$$\text{vapor pressure deficit}(VPD) = SVP - VAP, \quad (S3)$$

The MERRA-2 2-meter wind-speed product includes the eastward windU2M and northward windV2M, whose synthetic wind-speed is calculated as:

$$\text{Windspeed}(WSP) = \sqrt{(U2M^2 + V2M^2)}, \quad (S4)$$

### S1.3 List of Abbreviations

Table S2 List of Abbreviations

| Abbreviation | Definition                                                       |
|--------------|------------------------------------------------------------------|
| ML           | Machine Learning                                                 |
| BP           | Boreal Peatland                                                  |
| PLFA         | Phospholipid Fatty Acid                                          |
| GFED         | The Global Fire Emission Database                                |
| FireCCI      | The Fire Climate Change Initiative                               |
| MODIS        | The Moderate Resolution Imaging Spectroradiometer                |
| CRU          | The Climatic Research Unit                                       |
| GIMMIS 3g    | Third-generation Global Inventory Monitoring and Modeling System |
| BA           | Burned Area                                                      |
| C            | Carbon                                                           |
| TMP          | Near-surface Temperature                                         |
| TMN          | Near-surface Temperature Minimum                                 |
| TMX          | Near-surface Temperature Maximum                                 |
| DTR          | Diurnal temperature range                                        |
| PRE          | Precipitation                                                    |
| ET           | Evapotranspiration                                               |
| WET          | Wet Day Frequency                                                |
| VAP          | Vapor Pressure                                                   |
| CLD          | Cloud Cover Percentage                                           |
| FRT          | Ground Frost Frequency                                           |
| PDSI         | Palmer Drought Severity Index                                    |
| SVP          | Saturated Vapor Pressure                                         |
| RH           | Relative Humidity                                                |
| VPD          | Vapor Pressure Deficit                                           |
| WIN          | 2-m Windspeed                                                    |
| GPP          | Gross Primary Productivity                                       |
| SMsurf       | Surface Soil Moisture                                            |
| SMroot       | Root Soil Moisture                                               |
| NDVI         | Normalized Difference Vegetation Index                           |
| POPD         | Population Density                                               |
| FDR          | False Discovery Rate                                             |
| FOR          | False Omission Rate                                              |
| PPV          | Positive Predictive Value                                        |
| NPV          | Negative Predictive Value                                        |
| TP           | True Positive                                                    |
| TN           | True Negative                                                    |
| FP           | False Positive                                                   |
| FN           | False Negative                                                   |
| SMOTE        | Synthetic Minority Oversampling Techniques                       |
| LogR         | Logistic Regression                                              |
| SVMs         | Support Vector Machines                                          |
| BAG          | Bagging                                                          |
| KNN          | K-nearest neighbors                                              |
| GNB          | Gaussian Naïve Bayes                                             |
| LASSO        | Least Absolute Shrinkage and Selection Operator                  |
| AdaBoost     | Adaptive Boosting                                                |
| RF           | Random Forest                                                    |

Table S2 continued

---

|        |                           |
|--------|---------------------------|
| GBR    | Gradient Boosting         |
| Bayes  | Bayesian regression       |
| EN     | Elastic Net               |
| Kernel | Kernel Ridge              |
| DT     | Decision tree             |
| CBR    | CatBoost                  |
| LGBR   | Light Gradient boosting   |
| XGBR   | Extreme Gradient boosting |

---

### S1.4 Validation metrics

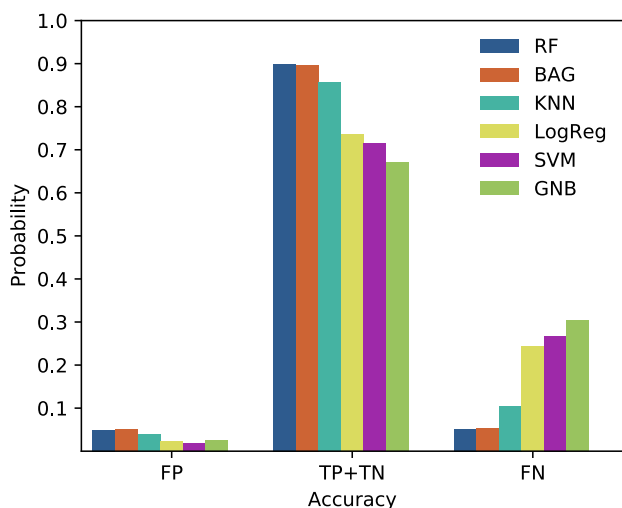

**Figure S1** The histogram plots of accuracy metrics between ML predicted and observed fire/no-fire classes based on FireCCI burned area dataset. The FN stands for False Negative prediction, whose value is -1, which means that observed fires are wrongly predicted as no-fires; TP and FN stand for True Positive and False Negative predictions respectively, whose value is 0, meaning fires or no-fires are both correctly predicted; and FP stands for False Positive prediction, whose values is 1, meaning observed no-fire months are wrongly predicted as fire months.

**Table S3 The testing evaluation metrics of simulations with different datasets; the mean value and standardized error are calculated from multiple machine learning techniques**

| Simulations    | Data       | Accuracy    | Recall      | Precision   | AUC         | PPV         | FDR         | FOR         | NPV         |
|----------------|------------|-------------|-------------|-------------|-------------|-------------|-------------|-------------|-------------|
| all            | FireCCI_BA | 0.81 ± 0.08 | 0.71 ± 0.12 | 0.43 ± 0.13 | 0.77 ± 0.03 | 0.43 ± 0.13 | 0.57 ± 0.13 | 0.05 ± 0.01 | 0.95 ± 0.01 |
| no-humi        | FireCCI_BA | 0.78 ± 0.09 | 0.68 ± 0.11 | 0.37 ± 0.11 | 0.74 ± 0.02 | 0.37 ± 0.11 | 0.63 ± 0.11 | 0.06 ± 0.01 | 0.94 ± 0.01 |
| no-pre         | FireCCI_BA | 0.79 ± 0.09 | 0.70 ± 0.11 | 0.40 ± 0.11 | 0.75 ± 0.02 | 0.40 ± 0.11 | 0.60 ± 0.11 | 0.05 ± 0.01 | 0.95 ± 0.01 |
| no-soimoi      | FireCCI_BA | 0.79 ± 0.09 | 0.68 ± 0.13 | 0.40 ± 0.11 | 0.75 ± 0.03 | 0.40 ± 0.11 | 0.60 ± 0.11 | 0.05 ± 0.02 | 0.95 ± 0.02 |
| no-tmp         | FireCCI_BA | 0.79 ± 0.09 | 0.71 ± 0.11 | 0.40 ± 0.11 | 0.76 ± 0.02 | 0.40 ± 0.11 | 0.60 ± 0.11 | 0.05 ± 0.01 | 0.95 ± 0.01 |
| no-tmp-hmi     | FireCCI_BA | 0.78 ± 0.08 | 0.67 ± 0.08 | 0.36 ± 0.10 | 0.73 ± 0.02 | 0.36 ± 0.10 | 0.64 ± 0.10 | 0.06 ± 0.01 | 0.94 ± 0.01 |
| no-tmp-pre     | FireCCI_BA | 0.79 ± 0.08 | 0.70 ± 0.11 | 0.39 ± 0.11 | 0.75 ± 0.02 | 0.39 ± 0.11 | 0.61 ± 0.11 | 0.05 ± 0.01 | 0.95 ± 0.01 |
| no-tmp-pre-hmi | FireCCI_BA | 0.78 ± 0.08 | 0.66 ± 0.07 | 0.35 ± 0.10 | 0.73 ± 0.02 | 0.35 ± 0.10 | 0.65 ± 0.10 | 0.06 ± 0.01 | 0.94 ± 0.01 |
| no-tmp-smo     | FireCCI_BA | 0.79 ± 0.09 | 0.70 ± 0.12 | 0.39 ± 0.11 | 0.75 ± 0.02 | 0.39 ± 0.11 | 0.61 ± 0.11 | 0.05 ± 0.01 | 0.95 ± 0.01 |
| all            | GFED_BA    | 0.83 ± 0.07 | 0.78 ± 0.03 | 0.53 ± 0.13 | 0.81 ± 0.03 | 0.53 ± 0.13 | 0.47 ± 0.13 | 0.05 ± 0.00 | 0.95 ± 0.00 |
| no-humi        | GFED_BA    | 0.78 ± 0.07 | 0.73 ± 0.06 | 0.45 ± 0.11 | 0.76 ± 0.02 | 0.45 ± 0.11 | 0.55 ± 0.11 | 0.06 ± 0.01 | 0.94 ± 0.01 |
| no-pre         | GFED_BA    | 0.80 ± 0.07 | 0.73 ± 0.08 | 0.48 ± 0.11 | 0.77 ± 0.03 | 0.48 ± 0.11 | 0.52 ± 0.11 | 0.06 ± 0.01 | 0.94 ± 0.01 |
| no-soimoi      | GFED_BA    | 0.80 ± 0.07 | 0.73 ± 0.08 | 0.48 ± 0.11 | 0.77 ± 0.02 | 0.48 ± 0.11 | 0.52 ± 0.11 | 0.06 ± 0.01 | 0.94 ± 0.01 |
| no-tmp         | GFED_BA    | 0.80 ± 0.07 | 0.74 ± 0.06 | 0.48 ± 0.11 | 0.78 ± 0.02 | 0.48 ± 0.11 | 0.52 ± 0.11 | 0.06 ± 0.01 | 0.94 ± 0.01 |
| no-tmp-hmi     | GFED_BA    | 0.79 ± 0.06 | 0.71 ± 0.05 | 0.46 ± 0.10 | 0.76 ± 0.02 | 0.46 ± 0.10 | 0.54 ± 0.10 | 0.07 ± 0.01 | 0.93 ± 0.01 |
| no-tmp-pre     | GFED_BA    | 0.80 ± 0.07 | 0.74 ± 0.07 | 0.48 ± 0.11 | 0.78 ± 0.02 | 0.48 ± 0.11 | 0.52 ± 0.11 | 0.06 ± 0.01 | 0.94 ± 0.01 |
| no-tmp-pre-hmi | GFED_BA    | 0.80 ± 0.06 | 0.72 ± 0.03 | 0.47 ± 0.10 | 0.77 ± 0.03 | 0.47 ± 0.10 | 0.53 ± 0.10 | 0.06 ± 0.00 | 0.94 ± 0.00 |
| no-tmp-smo     | GFED_BA    | 0.80 ± 0.07 | 0.74 ± 0.06 | 0.47 ± 0.11 | 0.77 ± 0.02 | 0.47 ± 0.11 | 0.53 ± 0.11 | 0.06 ± 0.01 | 0.94 ± 0.01 |
| all            | GFED_C     | 0.83 ± 0.07 | 0.78 ± 0.03 | 0.53 ± 0.13 | 0.81 ± 0.03 | 0.53 ± 0.13 | 0.47 ± 0.13 | 0.05 ± 0.00 | 0.95 ± 0.00 |
| no-humi        | GFED_C     | 0.78 ± 0.07 | 0.73 ± 0.06 | 0.45 ± 0.11 | 0.76 ± 0.02 | 0.45 ± 0.11 | 0.55 ± 0.11 | 0.06 ± 0.01 | 0.94 ± 0.01 |
| no-pre         | GFED_C     | 0.80 ± 0.07 | 0.73 ± 0.08 | 0.48 ± 0.11 | 0.77 ± 0.03 | 0.48 ± 0.11 | 0.52 ± 0.11 | 0.06 ± 0.01 | 0.94 ± 0.01 |
| no-soimoi      | GFED_C     | 0.80 ± 0.07 | 0.73 ± 0.08 | 0.48 ± 0.11 | 0.77 ± 0.02 | 0.48 ± 0.11 | 0.52 ± 0.11 | 0.06 ± 0.01 | 0.94 ± 0.01 |
| no-tmp         | GFED_C     | 0.80 ± 0.07 | 0.74 ± 0.06 | 0.48 ± 0.11 | 0.78 ± 0.02 | 0.48 ± 0.11 | 0.52 ± 0.11 | 0.06 ± 0.01 | 0.94 ± 0.01 |
| no-tmp-hmi     | GFED_C     | 0.79 ± 0.06 | 0.71 ± 0.05 | 0.46 ± 0.10 | 0.76 ± 0.02 | 0.46 ± 0.10 | 0.54 ± 0.10 | 0.07 ± 0.01 | 0.93 ± 0.01 |
| no-tmp-pre     | GFED_C     | 0.80 ± 0.07 | 0.74 ± 0.07 | 0.48 ± 0.11 | 0.78 ± 0.02 | 0.48 ± 0.11 | 0.52 ± 0.11 | 0.06 ± 0.01 | 0.94 ± 0.01 |
| no-tmp-pre-hmi | GFED_C     | 0.79 ± 0.06 | 0.71 ± 0.04 | 0.46 ± 0.10 | 0.76 ± 0.02 | 0.46 ± 0.10 | 0.54 ± 0.10 | 0.07 ± 0.00 | 0.93 ± 0.00 |
| no-tmp-smo     | GFED_C     | 0.80 ± 0.07 | 0.74 ± 0.06 | 0.47 ± 0.11 | 0.77 ± 0.02 | 0.47 ± 0.11 | 0.53 ± 0.11 | 0.06 ± 0.01 | 0.94 ± 0.01 |

**Table S3 continued**

| Simulations    | Data    | Accuracy    | Recall      | Precision   | AUC         | PPV         | FDR         | FOR         | NPV         |
|----------------|---------|-------------|-------------|-------------|-------------|-------------|-------------|-------------|-------------|
| all            | MCD45A1 | 0.89 ± 0.06 | 0.89 ± 0.07 | 0.94 ± 0.02 | 0.88 ± 0.05 | 0.94 ± 0.02 | 0.06 ± 0.02 | 0.20 ± 0.09 | 0.80 ± 0.09 |
| no-humi        | MCD45A1 | 0.88 ± 0.04 | 0.89 ± 0.05 | 0.92 ± 0.02 | 0.87 ± 0.04 | 0.92 ± 0.02 | 0.08 ± 0.02 | 0.21 ± 0.07 | 0.79 ± 0.07 |
| no-pre         | MCD45A1 | 0.87 ± 0.05 | 0.88 ± 0.07 | 0.92 ± 0.02 | 0.87 ± 0.05 | 0.92 ± 0.02 | 0.08 ± 0.02 | 0.21 ± 0.09 | 0.79 ± 0.09 |
| no-soimoi      | MCD45A1 | 0.87 ± 0.05 | 0.88 ± 0.07 | 0.93 ± 0.02 | 0.87 ± 0.04 | 0.93 ± 0.02 | 0.07 ± 0.02 | 0.21 ± 0.08 | 0.79 ± 0.08 |
| no-tmp         | MCD45A1 | 0.87 ± 0.06 | 0.87 ± 0.09 | 0.93 ± 0.03 | 0.87 ± 0.05 | 0.93 ± 0.03 | 0.07 ± 0.03 | 0.22 ± 0.10 | 0.78 ± 0.10 |
| no-tmp-hmi     | MCD45A1 | 0.86 ± 0.07 | 0.86 ± 0.09 | 0.92 ± 0.03 | 0.86 ± 0.06 | 0.92 ± 0.03 | 0.08 ± 0.03 | 0.24 ± 0.10 | 0.76 ± 0.10 |
| no-tmp-pre     | MCD45A1 | 0.87 ± 0.06 | 0.87 ± 0.09 | 0.93 ± 0.03 | 0.87 ± 0.06 | 0.93 ± 0.03 | 0.07 ± 0.03 | 0.23 ± 0.10 | 0.77 ± 0.10 |
| no-tmp-pre-hmi | MCD45A1 | 0.86 ± 0.07 | 0.86 ± 0.09 | 0.93 ± 0.03 | 0.86 ± 0.06 | 0.93 ± 0.03 | 0.07 ± 0.03 | 0.24 ± 0.10 | 0.76 ± 0.10 |
| no-tmp-smo     | MCD45A1 | 0.87 ± 0.06 | 0.87 ± 0.09 | 0.93 ± 0.03 | 0.86 ± 0.05 | 0.93 ± 0.03 | 0.07 ± 0.03 | 0.23 ± 0.10 | 0.77 ± 0.10 |
| all            | MCD64A1 | 0.79 ± 0.08 | 0.70 ± 0.09 | 0.41 ± 0.11 | 0.75 ± 0.03 | 0.41 ± 0.11 | 0.59 ± 0.11 | 0.06 ± 0.01 | 0.94 ± 0.01 |
| no-humi        | MCD64A1 | 0.75 ± 0.09 | 0.63 ± 0.11 | 0.36 ± 0.10 | 0.70 ± 0.03 | 0.36 ± 0.10 | 0.64 ± 0.10 | 0.07 ± 0.01 | 0.93 ± 0.01 |
| no-pre         | MCD64A1 | 0.77 ± 0.09 | 0.66 ± 0.11 | 0.38 ± 0.10 | 0.72 ± 0.03 | 0.38 ± 0.10 | 0.62 ± 0.10 | 0.07 ± 0.01 | 0.93 ± 0.01 |
| no-soimoi      | MCD64A1 | 0.76 ± 0.10 | 0.63 ± 0.13 | 0.38 ± 0.10 | 0.71 ± 0.03 | 0.38 ± 0.10 | 0.62 ± 0.10 | 0.07 ± 0.01 | 0.93 ± 0.01 |
| no-tmp         | MCD64A1 | 0.77 ± 0.09 | 0.65 ± 0.12 | 0.38 ± 0.10 | 0.72 ± 0.03 | 0.38 ± 0.10 | 0.62 ± 0.10 | 0.07 ± 0.01 | 0.93 ± 0.01 |
| no-tmp-hmi     | MCD64A1 | 0.77 ± 0.08 | 0.62 ± 0.09 | 0.37 ± 0.10 | 0.71 ± 0.03 | 0.37 ± 0.10 | 0.63 ± 0.10 | 0.07 ± 0.01 | 0.93 ± 0.01 |
| no-tmp-pre     | MCD64A1 | 0.77 ± 0.09 | 0.67 ± 0.09 | 0.39 ± 0.11 | 0.73 ± 0.03 | 0.39 ± 0.11 | 0.61 ± 0.11 | 0.06 ± 0.01 | 0.94 ± 0.01 |
| no-tmp-pre-hmi | MCD64A1 | 0.77 ± 0.08 | 0.62 ± 0.08 | 0.37 ± 0.10 | 0.70 ± 0.03 | 0.37 ± 0.10 | 0.63 ± 0.10 | 0.07 ± 0.01 | 0.93 ± 0.01 |
| no-tmp-smo     | MCD64A1 | 0.76 ± 0.09 | 0.65 ± 0.10 | 0.37 ± 0.11 | 0.71 ± 0.03 | 0.37 ± 0.11 | 0.63 ± 0.11 | 0.07 ± 0.01 | 0.93 ± 0.01 |

**Table S4 random forest performances in different simulations with different datasets**

| Dataset     | Model | Simulation | Type    | Accuracy | Recall | Precision | F1-score | AUC  | PPV  | FDR  | FOR  | NPV  |
|-------------|-------|------------|---------|----------|--------|-----------|----------|------|------|------|------|------|
| FireCCI_B A | RF    | all        | testing | 0.90     | 0.62   | 0.61      | 0.61     | 0.78 | 0.61 | 0.39 | 0.06 | 0.94 |
| FireCCI_B A | RF    | no-tmp     | testing | 0.89     | 0.60   | 0.56      | 0.58     | 0.77 | 0.56 | 0.44 | 0.06 | 0.94 |
| FireCCI_B A | RF    | no-pre     | testing | 0.89     | 0.60   | 0.55      | 0.57     | 0.76 | 0.55 | 0.45 | 0.06 | 0.94 |
| FireCCI_B A | RF    | no-humi    | testing | 0.88     | 0.57   | 0.53      | 0.55     | 0.75 | 0.53 | 0.47 | 0.06 | 0.94 |

|                |    |                    |         |      |      |      |      |      |      |      |      |      |
|----------------|----|--------------------|---------|------|------|------|------|------|------|------|------|------|
| FireCCI_B<br>A | RF | no-soimoi          | testing | 0.89 | 0.60 | 0.55 | 0.57 | 0.76 | 0.55 | 0.45 | 0.06 | 0.94 |
| FireCCI_B<br>A | RF | no-tmp-pre         | testing | 0.89 | 0.60 | 0.55 | 0.57 | 0.76 | 0.55 | 0.45 | 0.06 | 0.94 |
| FireCCI_B<br>A | RF | no-tmp-<br>hmi     | testing | 0.87 | 0.59 | 0.51 | 0.55 | 0.75 | 0.51 | 0.49 | 0.06 | 0.94 |
| FireCCI_B<br>A | RF | no-tmp-<br>smo     | testing | 0.89 | 0.60 | 0.56 | 0.58 | 0.77 | 0.56 | 0.44 | 0.06 | 0.94 |
| FireCCI_B<br>A | RF | no-tmp-<br>pre-hmi | testing | 0.87 | 0.58 | 0.51 | 0.54 | 0.75 | 0.51 | 0.49 | 0.06 | 0.94 |
| GFED_BA        | RF | all                | testing | 0.90 | 0.74 | 0.70 | 0.72 | 0.84 | 0.70 | 0.30 | 0.05 | 0.95 |
| GFED_BA        | RF | no-tmp             | testing | 0.88 | 0.68 | 0.63 | 0.65 | 0.80 | 0.63 | 0.37 | 0.07 | 0.93 |
| GFED_BA        | RF | no-pre             | testing | 0.88 | 0.68 | 0.63 | 0.65 | 0.80 | 0.63 | 0.37 | 0.07 | 0.93 |
| GFED_BA        | RF | no-humi            | testing | 0.87 | 0.67 | 0.60 | 0.63 | 0.79 | 0.60 | 0.40 | 0.07 | 0.93 |
| GFED_BA        | RF | no-soimoi          | testing | 0.88 | 0.68 | 0.62 | 0.65 | 0.80 | 0.62 | 0.38 | 0.07 | 0.93 |
| GFED_BA        | RF | no-tmp-pre         | testing | 0.88 | 0.68 | 0.63 | 0.66 | 0.80 | 0.63 | 0.37 | 0.07 | 0.93 |
| GFED_BA        | RF | no-tmp-<br>hmi     | testing | 0.87 | 0.67 | 0.60 | 0.64 | 0.79 | 0.60 | 0.40 | 0.07 | 0.93 |
| GFED_BA        | RF | no-tmp-<br>smo     | testing | 0.88 | 0.68 | 0.63 | 0.65 | 0.80 | 0.63 | 0.37 | 0.07 | 0.93 |
| GFED_BA        | RF | no-tmp-<br>pre-hmi | testing | 0.88 | 0.68 | 0.62 | 0.65 | 0.80 | 0.62 | 0.38 | 0.07 | 0.93 |
| GFED_C         | RF | all                | testing | 0.90 | 0.74 | 0.70 | 0.72 | 0.84 | 0.70 | 0.30 | 0.05 | 0.95 |
| GFED_C         | RF | no-tmp             | testing | 0.88 | 0.68 | 0.63 | 0.65 | 0.80 | 0.63 | 0.37 | 0.07 | 0.93 |
| GFED_C         | RF | no-pre             | testing | 0.88 | 0.68 | 0.63 | 0.65 | 0.80 | 0.63 | 0.37 | 0.07 | 0.93 |
| GFED_C         | RF | no-humi            | testing | 0.87 | 0.67 | 0.60 | 0.63 | 0.79 | 0.60 | 0.40 | 0.07 | 0.93 |
| GFED_C         | RF | no-soimoi          | testing | 0.88 | 0.68 | 0.62 | 0.65 | 0.80 | 0.62 | 0.38 | 0.07 | 0.93 |
| GFED_C         | RF | no-tmp-pre         | testing | 0.88 | 0.68 | 0.63 | 0.66 | 0.80 | 0.63 | 0.37 | 0.07 | 0.93 |
| GFED_C         | RF | no-tmp-<br>hmi     | testing | 0.87 | 0.67 | 0.60 | 0.64 | 0.79 | 0.60 | 0.40 | 0.07 | 0.93 |
| GFED_C         | RF | no-tmp-<br>smo     | testing | 0.88 | 0.68 | 0.63 | 0.65 | 0.80 | 0.63 | 0.37 | 0.07 | 0.93 |
| GFED_C         | RF | no-tmp-<br>pre-hmi | testing | 0.87 | 0.66 | 0.60 | 0.63 | 0.79 | 0.60 | 0.40 | 0.07 | 0.93 |
| MCD45A1        | RF | all                | testing | 0.94 | 0.94 | 0.96 | 0.95 | 0.93 | 0.96 | 0.04 | 0.11 | 0.89 |

**Table S4 continued**



| Dataset | Model | Simulation     | Type    | Accuracy | Recall | Precision | F1-score | AUC  | PPV  | FDR  | FOR  | NPV  |
|---------|-------|----------------|---------|----------|--------|-----------|----------|------|------|------|------|------|
| MCD45A1 | RF    | no-tmp         | testing | 0.93     | 0.93   | 0.95      | 0.94     | 0.92 | 0.95 | 0.05 | 0.13 | 0.87 |
| MCD45A1 | RF    | no-pre         | testing | 0.92     | 0.94   | 0.95      | 0.94     | 0.92 | 0.95 | 0.05 | 0.13 | 0.87 |
| MCD45A1 | RF    | no-humi        | testing | 0.92     | 0.94   | 0.95      | 0.94     | 0.92 | 0.95 | 0.05 | 0.12 | 0.88 |
| MCD45A1 | RF    | no-soimoi      | testing | 0.92     | 0.94   | 0.95      | 0.94     | 0.92 | 0.95 | 0.05 | 0.13 | 0.87 |
| MCD45A1 | RF    | no-tmp-pre     | testing | 0.93     | 0.94   | 0.96      | 0.95     | 0.92 | 0.96 | 0.04 | 0.12 | 0.88 |
| MCD45A1 | RF    | no-tmp-hmi     | testing | 0.92     | 0.93   | 0.95      | 0.94     | 0.92 | 0.95 | 0.05 | 0.13 | 0.87 |
| MCD45A1 | RF    | no-tmp-smo     | testing | 0.92     | 0.93   | 0.95      | 0.94     | 0.92 | 0.95 | 0.05 | 0.13 | 0.87 |
| MCD45A1 | RF    | no-tmp-pre-hmi | testing | 0.92     | 0.93   | 0.95      | 0.94     | 0.92 | 0.95 | 0.05 | 0.13 | 0.87 |
| MCD64A1 | RF    | all            | testing | 0.88     | 0.60   | 0.56      | 0.58     | 0.76 | 0.56 | 0.44 | 0.07 | 0.93 |
| MCD64A1 | RF    | no-tmp         | testing | 0.87     | 0.55   | 0.53      | 0.54     | 0.74 | 0.53 | 0.47 | 0.08 | 0.92 |
| MCD64A1 | RF    | no-pre         | testing | 0.86     | 0.54   | 0.52      | 0.53     | 0.73 | 0.52 | 0.48 | 0.08 | 0.92 |
| MCD64A1 | RF    | no-humi        | testing | 0.86     | 0.52   | 0.52      | 0.52     | 0.72 | 0.52 | 0.48 | 0.08 | 0.92 |
| MCD64A1 | RF    | no-soimoi      | testing | 0.86     | 0.52   | 0.52      | 0.52     | 0.72 | 0.52 | 0.48 | 0.08 | 0.92 |
| MCD64A1 | RF    | no-tmp-pre     | testing | 0.87     | 0.56   | 0.55      | 0.56     | 0.74 | 0.55 | 0.45 | 0.07 | 0.93 |
| MCD64A1 | RF    | no-tmp-hmi     | testing | 0.86     | 0.54   | 0.52      | 0.53     | 0.73 | 0.52 | 0.48 | 0.08 | 0.92 |
| MCD64A1 | RF    | no-tmp-smo     | testing | 0.86     | 0.53   | 0.52      | 0.52     | 0.72 | 0.52 | 0.48 | 0.08 | 0.92 |
| MCD64A1 | RF    | no-tmp-pre-hmi | testing | 0.86     | 0.54   | 0.52      | 0.53     | 0.73 | 0.52 | 0.48 | 0.08 | 0.92 |

**Table S5 validation accuracy for the ALL-simulation with SMOTE using RF**

| Data       | Sim. | Step    | Accuracy | Recall | Precision | F1-score | AUC  | PPV  | FDR  | FOR  | NPV  |
|------------|------|---------|----------|--------|-----------|----------|------|------|------|------|------|
| FireCCI_BA | ALL  | testing | 0.90     | 0.62   | 0.61      | 0.61     | 0.78 | 0.61 | 0.39 | 0.06 | 0.94 |
| GFED_BA    | ALL  | testing | 0.90     | 0.74   | 0.70      | 0.72     | 0.84 | 0.70 | 0.30 | 0.05 | 0.95 |
| GFED_C     | ALL  | testing | 0.90     | 0.74   | 0.70      | 0.72     | 0.84 | 0.70 | 0.30 | 0.05 | 0.95 |
| MCD45A1    | ALL  | testing | 0.94     | 0.94   | 0.96      | 0.95     | 0.93 | 0.96 | 0.04 | 0.11 | 0.89 |
| MCD64A1    | ALL  | testing | 0.88     | 0.60   | 0.56      | 0.58     | 0.76 | 0.56 | 0.44 | 0.07 | 0.93 |

**Table S6 validation accuracy for the ALL-simulation without SMOTE using RF**

| Data       | Sim. | Step    | Accuracy | Recall | Precision | F1-score | AUC  | PPV  | FDR  | FOR  | NPV  |
|------------|------|---------|----------|--------|-----------|----------|------|------|------|------|------|
| FireCCI_BA | ALL  | testing | 0.91     | 0.42   | 0.77      | 0.54     | 0.70 | 0.77 | 0.23 | 0.08 | 0.92 |
| GFED_BA    | ALL  | testing | 0.91     | 0.61   | 0.81      | 0.69     | 0.79 | 0.81 | 0.19 | 0.08 | 0.92 |
| GFED_C     | ALL  | testing | 0.91     | 0.61   | 0.81      | 0.69     | 0.79 | 0.81 | 0.19 | 0.08 | 0.92 |
| MCD45A1    | ALL  | testing | 0.94     | 0.96   | 0.96      | 0.96     | 0.93 | 0.96 | 0.04 | 0.09 | 0.91 |
| MCD64A1    | ALL  | testing | 0.89     | 0.42   | 0.72      | 0.53     | 0.70 | 0.72 | 0.28 | 0.09 | 0.91 |

**Table S7 The validation matrices of machine learning regression models with direct application**

| Model         | Stage    | MSE     | MAE   | R <sup>2</sup> | Model        | Stage    | MSE     | MAE   | R <sup>2</sup> |
|---------------|----------|---------|-------|----------------|--------------|----------|---------|-------|----------------|
| <i>Ada</i>    | training | 953.03  | 6.84  | 0.39           | <i>Lasso</i> | training | 1452.72 | 11.06 | 0.07           |
|               | testing  | 1068.78 | 6.91  | 0.12           |              | testing  | 1141.87 | 10.65 | 0.06           |
| <i>Bag</i>    | training | 154.47  | 2.38  | 0.90           | <i>LGBR</i>  | training | 344.76  | 4.51  | 0.78           |
|               | testing  | 927.57  | 6.31  | 0.23           |              | testing  | 761.45  | 7.03  | 0.37           |
| <i>Bayes</i>  | training | 1450.62 | 11.26 | 0.07           | <i>LinR</i>  | training | 1448.34 | 11.45 | 0.07           |
|               | testing  | 1142.95 | 10.85 | 0.05           |              | testing  | 1146.44 | 11.04 | 0.05           |
| <i>CBR</i>    | training | 63.89   | 3.13  | 0.96           | <i>RF</i>    | training | 139.32  | 2.40  | 0.91           |
|               | testing  | 810.75  | 6.49  | 0.33           |              | testing  | 928.29  | 6.42  | 0.23           |
| <i>DT</i>     | training | 0.00    | 0.00  | 1.00           | <i>Ridge</i> | training | 1450.14 | 11.38 | 0.07           |
|               | testing  | 1841.74 | 7.53  | -0.62          |              | testing  | 1144.92 | 11.00 | 0.05           |
| <i>EN</i>     | training | 1498.48 | 9.52  | 0.04           | <i>Stack</i> | training | 244.76  | 2.57  | 0.84           |
|               | testing  | 1159.71 | 8.99  | 0.04           |              | testing  | 804.62  | 5.55  | 0.33           |
| <i>GBR</i>    | training | 1302.99 | 8.55  | 0.17           | <i>XGBR</i>  | training | 1550.82 | 6.73  | 0.01           |
|               | testing  | 1123.06 | 8.31  | 0.07           |              | testing  | 1198.16 | 6.25  | 0.01           |
| <i>Kernel</i> | training | 1450.86 | 11.41 | 0.07           |              |          |         |       |                |
|               | testing  | 1147.22 | 11.03 | 0.05           |              |          |         |       |                |

## S2. Research Area

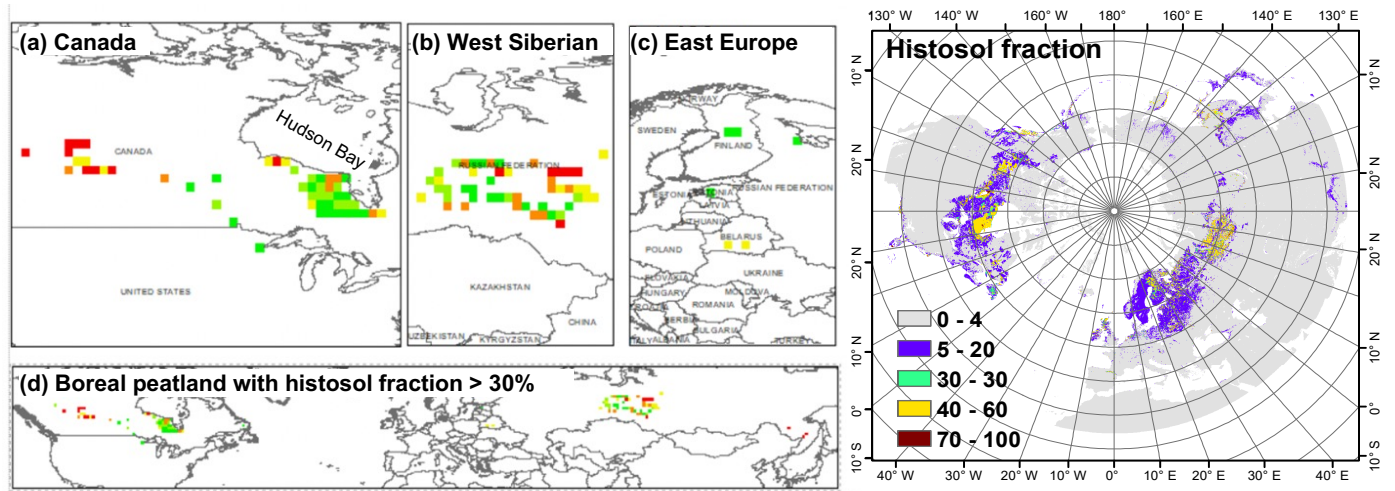

Figure S2 Research Area. Peatland fires are defined as fires happen in peatland area where histosol fraction greater than 30%. The research area mainly locates in Hudson Bay area (a), West Siberian (b), and very few area of East Europe (c).

## S3. Spatial Validation on Predicted Fire Counts

In this section, we mainly present the validating results of the predicted fire counts, spatially (in section S3) and temporally (in Section S4), with different datasets from the testing stage. These datasets include FireCCI BA, GFED BA, GFED C, MCD64A1 active fire, and MCD45A1 active fire.

### S3.1 FireCCI BA

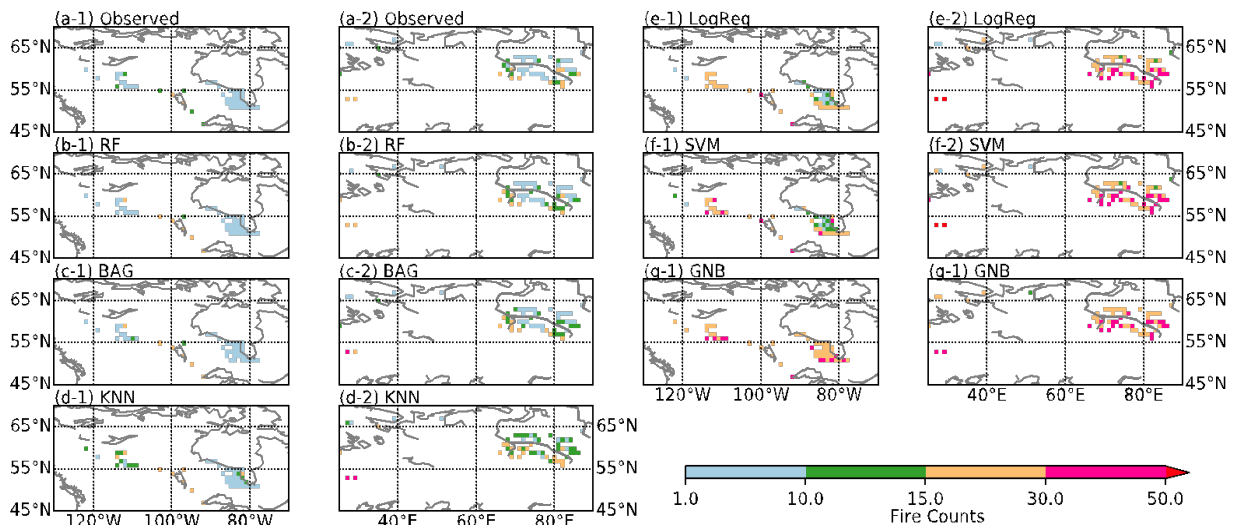

Figure S3 Spatial validation of observed and ML model predicted fire counts, based on FireCCI burned area. Subfigures in column (x-1) and (x-2) represent the data/results at Hudson Bay area (x-1) and west Siberian (x-2), respectively, where x stands for (a) observations, (b) Random Forest, (c) bagging, (d) K-nearest-neighbour, (e) logistic regression, (f) support vector machine, and (g) Gaussian Naïve Bayes model predictions.

### S3.2 GFED BA

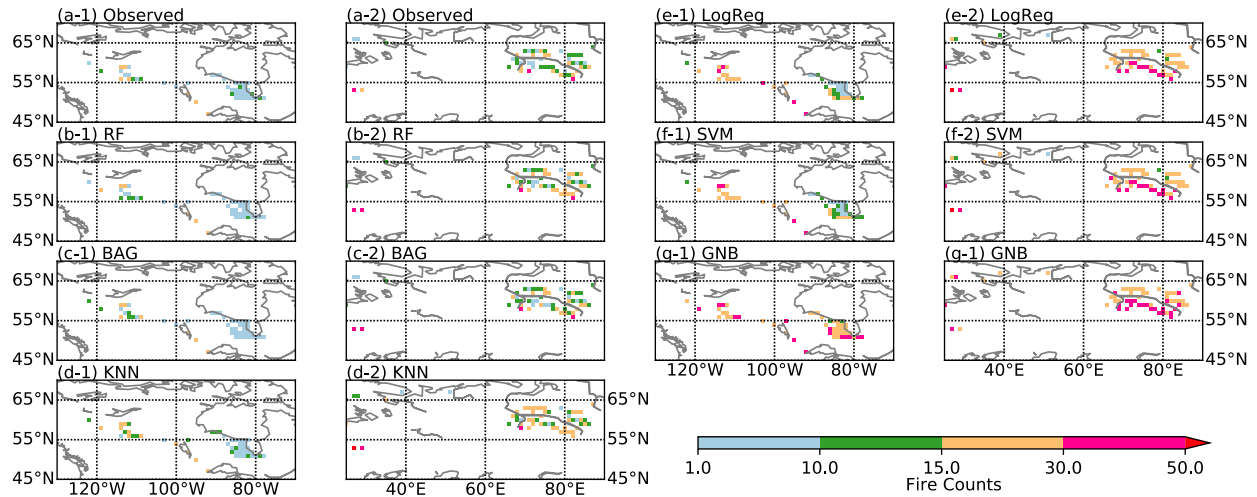

**Figure S4** Spatial validation of observed and ML model predicted fire counts, based on GFED burned area. Subfigures in column (x-1) and (x-2) represent the data/results at Hudson Bay area (x-1) and west Siberian (x-2), respectively, where x stands for (a) observations, (b) Random Forest, (c) bagging, (d) K-nearest-neighbour, (e) logistic regression, (f) support vector machine, and (g) Gaussian Naïve Bayes model predictions.

### GFED C emission

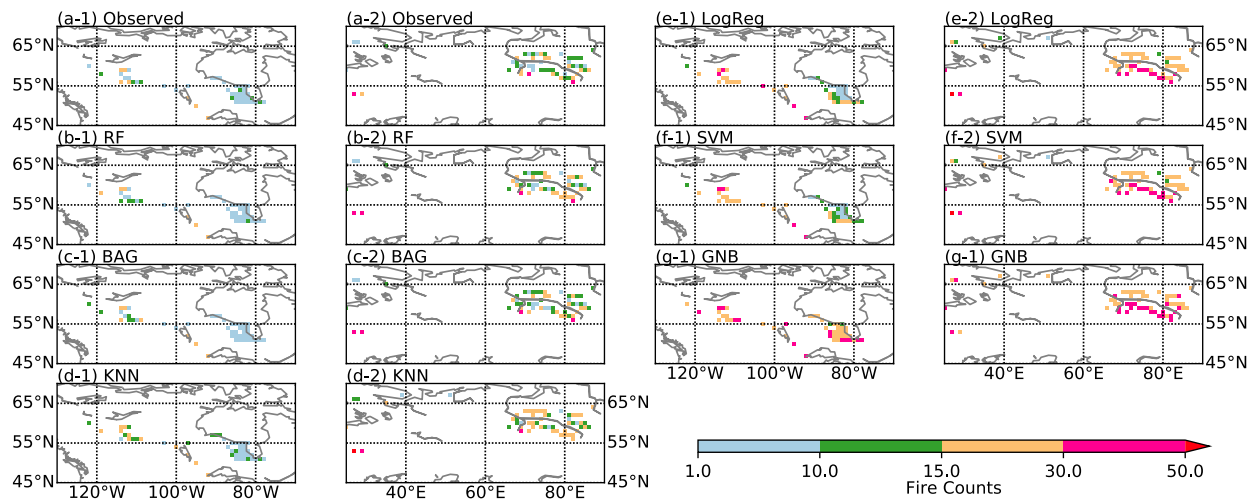

**Figure S5** Spatial validation of observed and ML model predicted fire counts, based on FireCCI C emission. Subfigures in column (x-1) and (x-2) represent the data/results at Hudson Bay area (x-1) and west Siberian (x-2), respectively, where x stands for (a) observations, (b) Random Forest, (c) bagging, (d) K-nearest-neighbour, (e) logistic regression, (f) support vector machine, and (g) Gaussian Naïve Bayes model predictions.

### S3.3 MCD64A1 active fire

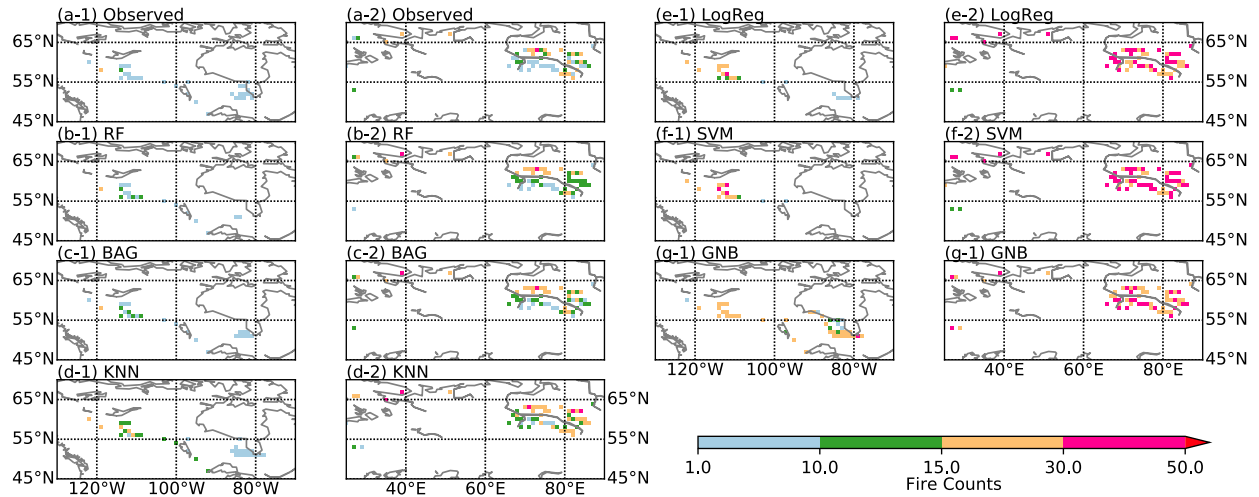

Figure S6 Spatial validation of observed and ML model predicted fire counts, based on MCD64A1 active fire. Subfigures in column (x-1) and (x-2) represent the data/results at Hudson Bay area (x-1) and west Siberian (x-2), respectively, where x stands for (a) observations, (b) Random Forest, (c) bagging, (d) K-nearest-neighbour, (e) logistic regression, (f) support vector machine, and (g) Gaussian Naïve Bayes model predictions.

### S3.4 MCD45A1 active fire

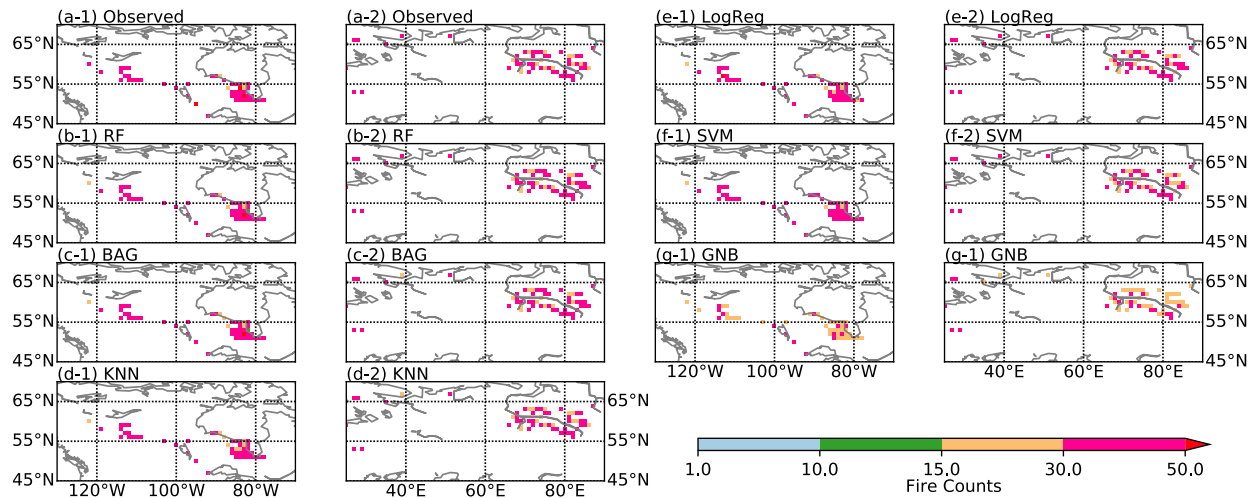

Figure S7 Spatial validation of observed and ML model predicted fire counts, based on MCD45A1 active fire. Subfigures in column (x-1) and (x-2) represent the data/results at Hudson Bay area (x-1) and west Siberian (x-2), respectively, where x stands for (a) observations, (b) Random Forest, (c) bagging, (d) K-nearest-neighbour, (e) logistic regression, (f) support vector machine, and (g) Gaussian Naïve Bayes model predictions.

#### S4. Temporal Validation of Predicted Fire Counts Seasonality

In this section, we mainly present the validating the seasonal distribution of predicted fire counts from the testing stage, with multiple fire datasets. These datasets include FireCCI BA, GFED BA, GFED C, MCD64A1 active fire, and MCD45A1 active fire.

##### S4.1 GFED BA

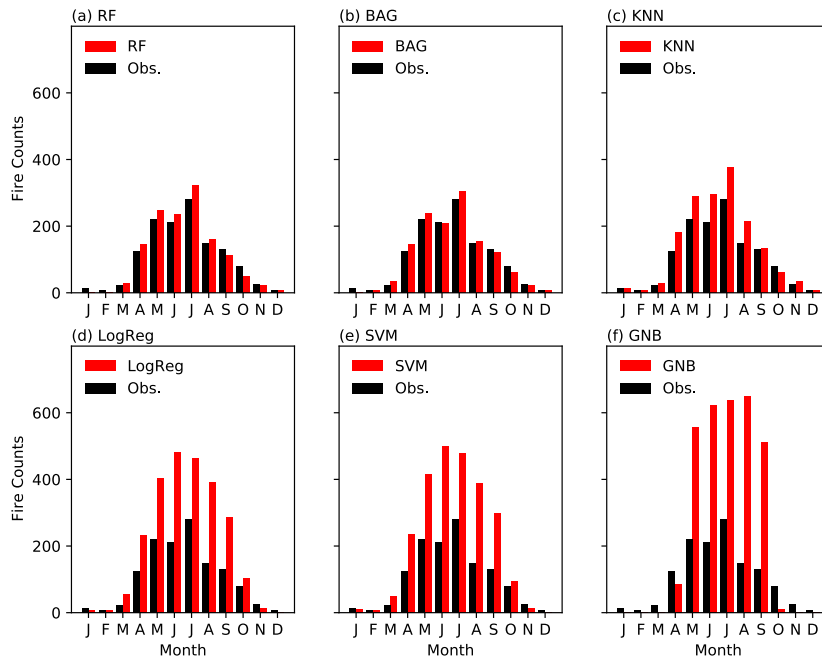

**Figure S8 Temporal validation of observed and ML model predicted fire counts with GFED burned area data. Predictions (red bars) from (a) Random Forest, (b) bagging, (c) K-nearest-neighbour, (d) logistic regression, (e) support vector machine, and (f) Gaussian Naïve Bayes model are compared with observations (black bars) in seasonal distributions.**

### S4.2 GFED C emission

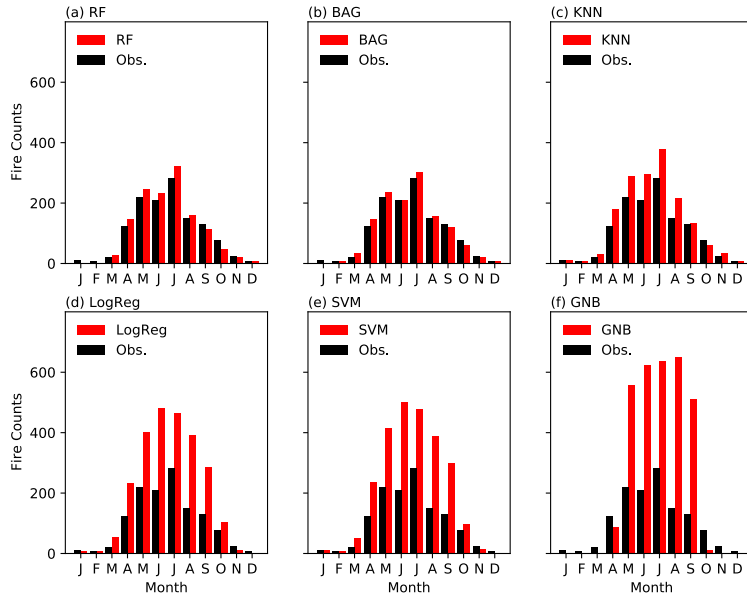

Figure S9 Temporal validation of observed and ML model predicted fire counts with GFED carbon emission. Predictions (red bars) from (a) Random Forest, (b) bagging, (c) K-nearest-neighbour, (d) logistic regression, (e) support vector machine, and (f) Gaussian Naïve Bayes model are compared with observations (black bars) in seasonal distributions.

### S4.3 MCD64A1 active fire

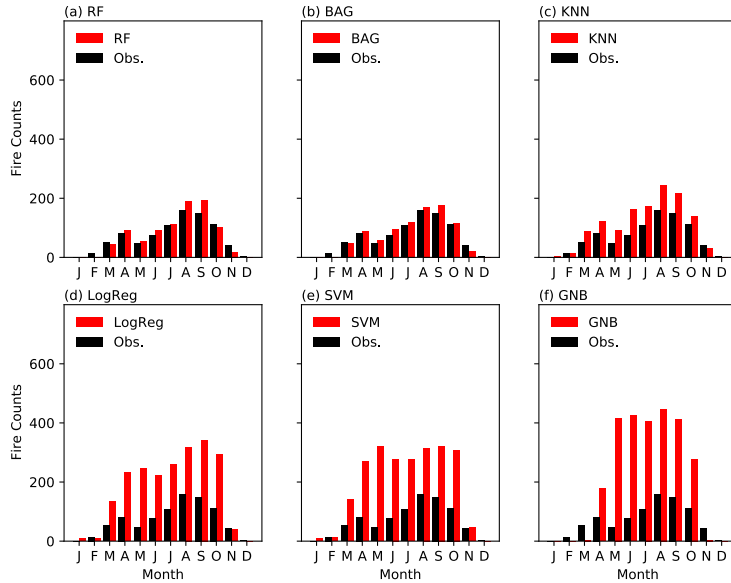

Figure S10 Temporal validation of observed and ML model predicted fire counts with MCD64A1 active fire data. Predictions (red bars) from (a) Random Forest, (b) bagging, (c) K-nearest-neighbour, (d) logistic regression, (e) support vector machine, and (f) Gaussian Naïve Bayes model are compared with observations (black bars) in seasonal distributions.

#### S4.4 MCD45A1 active fire

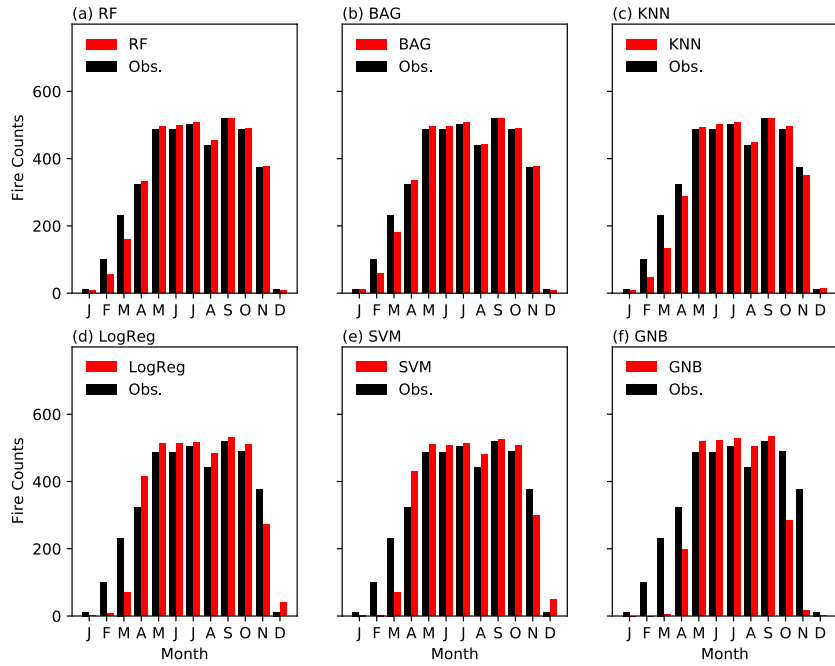

**Figure S11** Temporal validation of observed and ML model predicted fire counts with MCD45A1 active fire data. Predictions (red bars) from (a) Random Forest, (b) bagging, (c) K-nearest-neighbour, (d) logistic regression, (e) support vector machine, and (f) Gaussian Naïve Bayes model are compared with observations (black bars) in seasonal distributions.

#### S5. Validation on Major Contributing Factors with Factor-control Simulations and Multi-datasets

In this section, we mainly present the feature importance ranking from multiple factor-controlling simulations in multi-datasets. These datasets include GFED BA, GFED C, MCD64A1 active fire, and MCD45A1 active fire. As the FireCCI-based simulation results are presented in the main text, we will not present it here.



### S5.1 Feature importance from simulations based on GFED BA

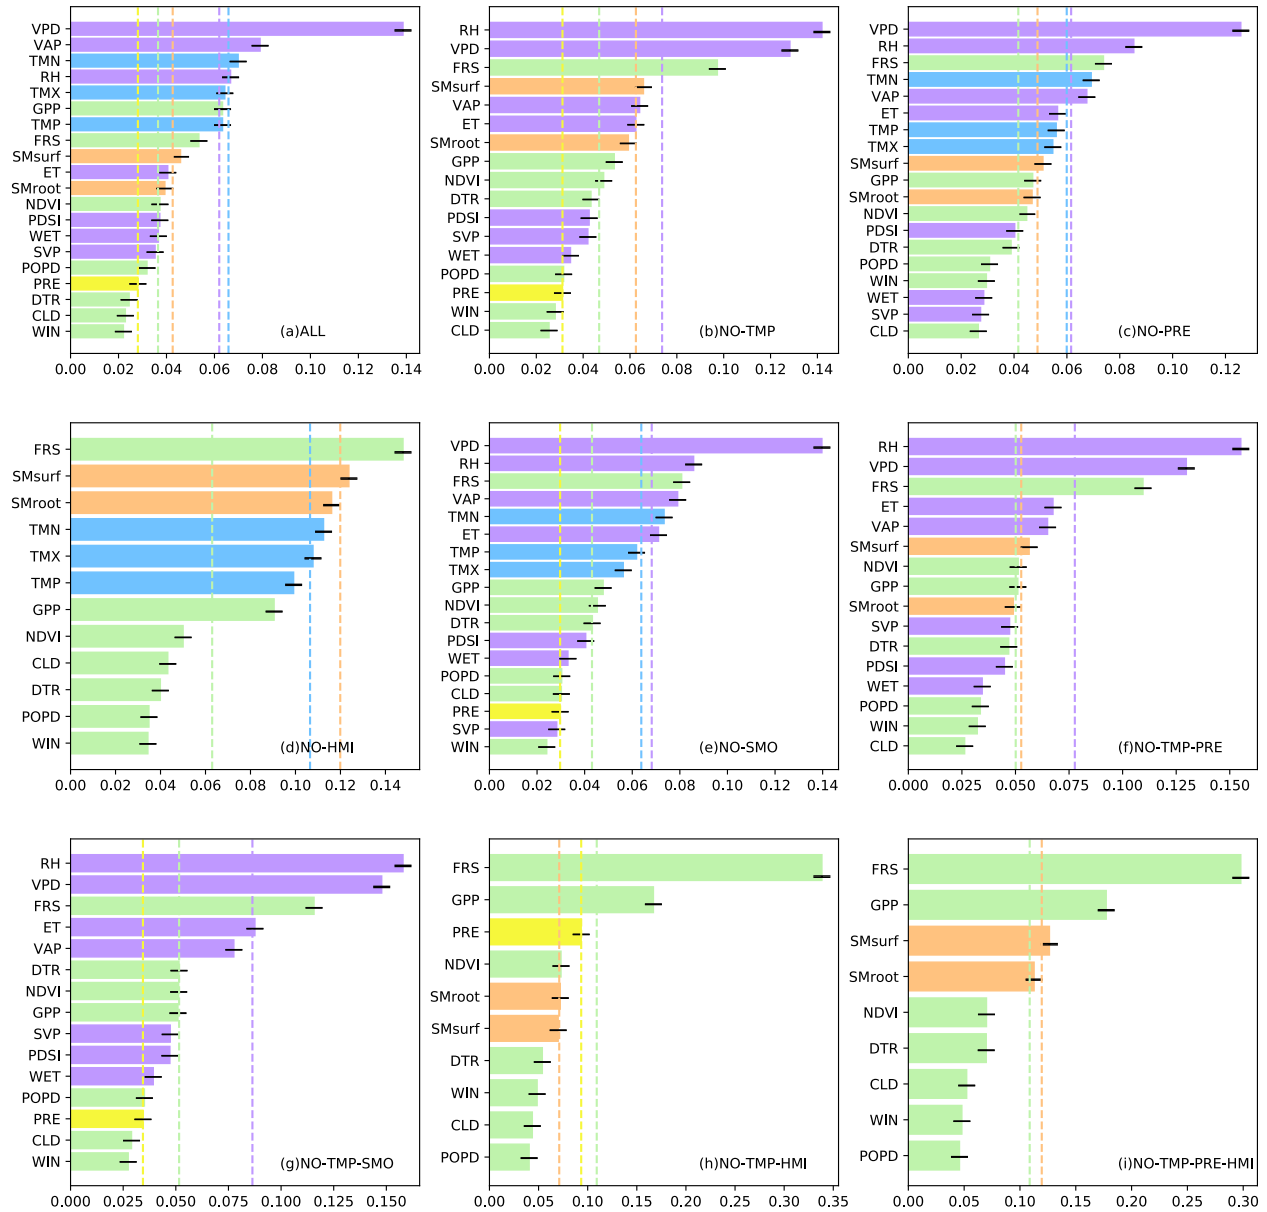

**Figure S12** The synthesised factor contribution importance ranking in a range of factor-control simulations: (a) include all factor, (b) exclude features in the temperature group (marked in blue), (c) exclude features in Precipitation group (yellow), (d) exclude air-dryness group (pink), (e) exclude soil moisture group (orange), (f) exclude both temperature and precipitation, (g) exclude temperature and soil moisture, (h) exclude temperature and air-dryness, and (i) exclude temperature, precipitation, and air dryness, where the vertical lines are the mean importance of grouped features with the same colour.

## S5.2 Feature importance from simulations based on GFED C emission

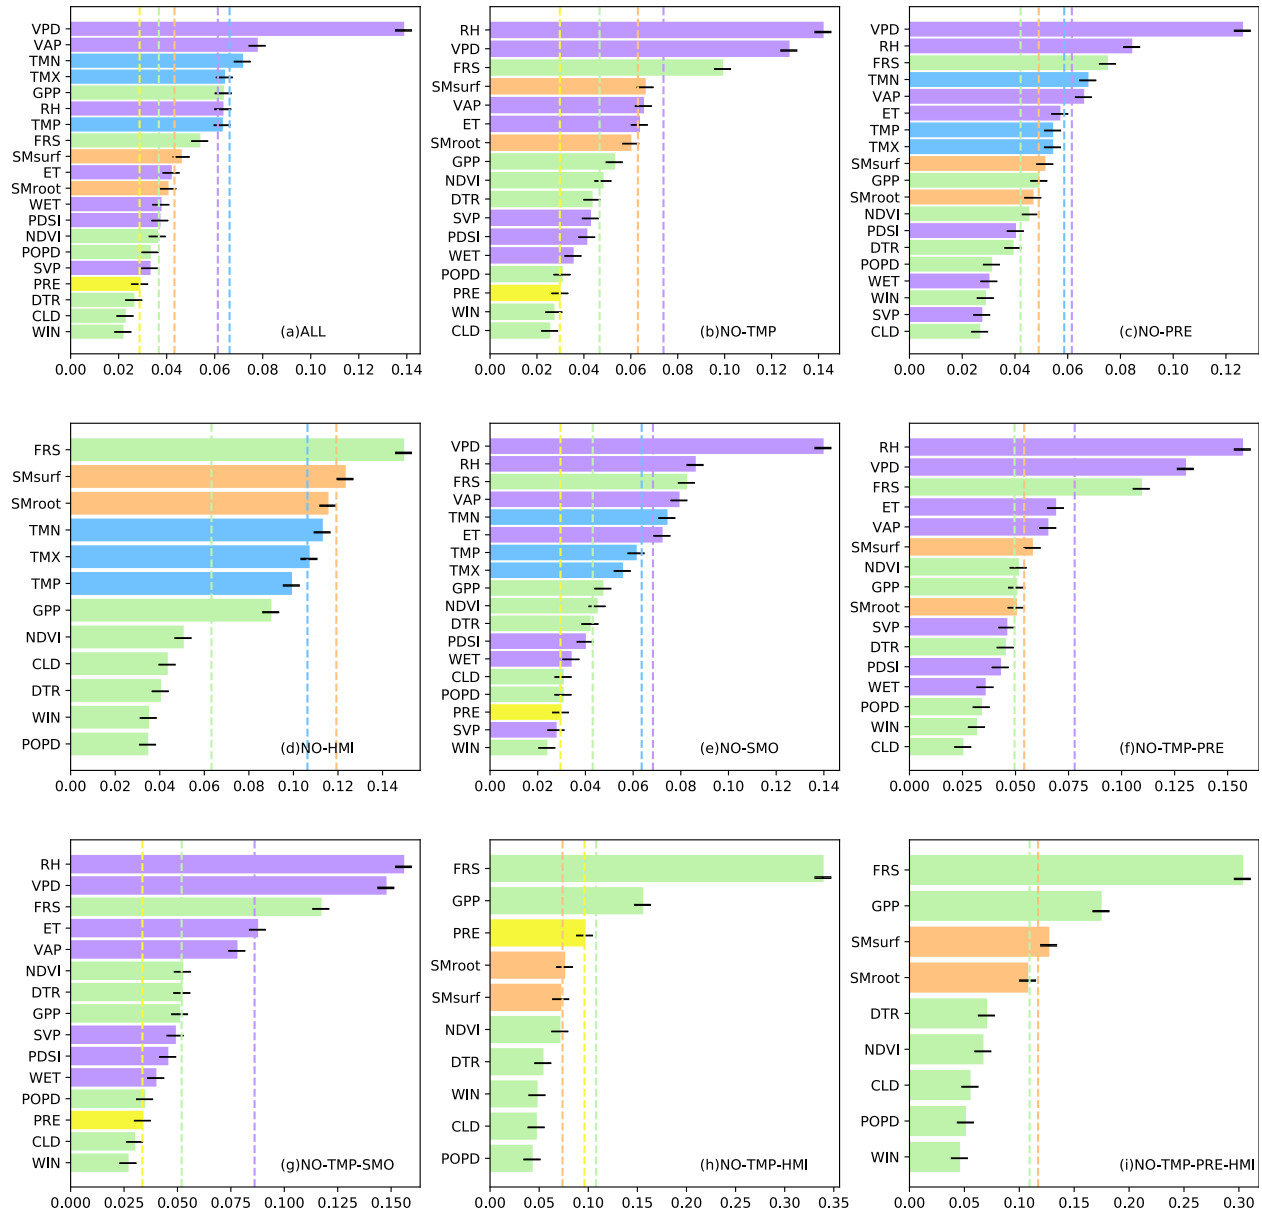

**Figure S13** The synthesised factor contribution importance ranking in a range of factor-control simulations: (a) include all factor, (b) exclude features in the temperature group (marked in blue), (c) exclude features in Precipitation group (yellow), (c) exclude air-dryness group (pink), (e) exclude soil moisture group (orange), (f) exclude both temperature and precipitation, (g) exclude temperature and soil moisture, (h) exclude temperature and air-dryness, and (i) exclude temperature, precipitation, and air dryness, where the vertical lines are the mean importance of grouped features with the same colour.

### S5.3 Feature importance from simulations based on MCD64A1

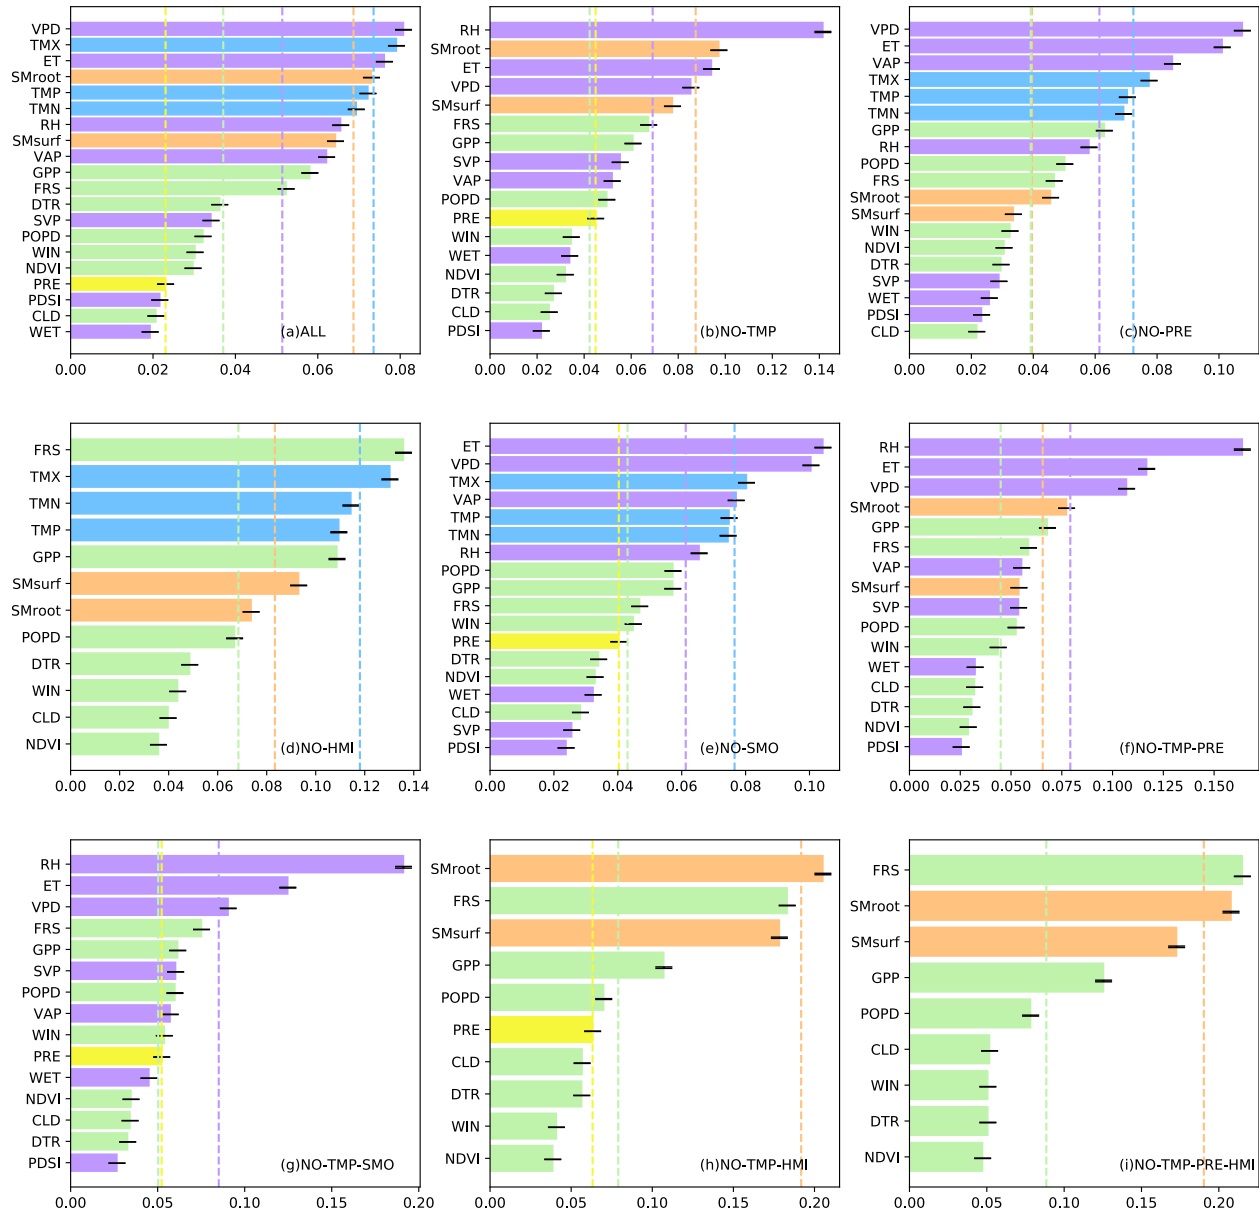

Figure S14 The synthesised factor contribution importance ranking in a range of factor-control simulations: (a) include all factor, (b) exclude features in the temperature group (marked in blue), (c) exclude features in Precipitation group (yellow), (c) exclude air-dryness group (pink), (e) exclude soil moisture group (orange), (f) exclude both temperature and precipitation, (g) exclude temperature and soil moisture, (h) exclude temperature and air-dryness, and (i) exclude temperature, precipitation, and air dryness, where the vertical lines are the mean importance of grouped features with the same colour.

## S5.4 Feature importance from simulations based on MCD45A1

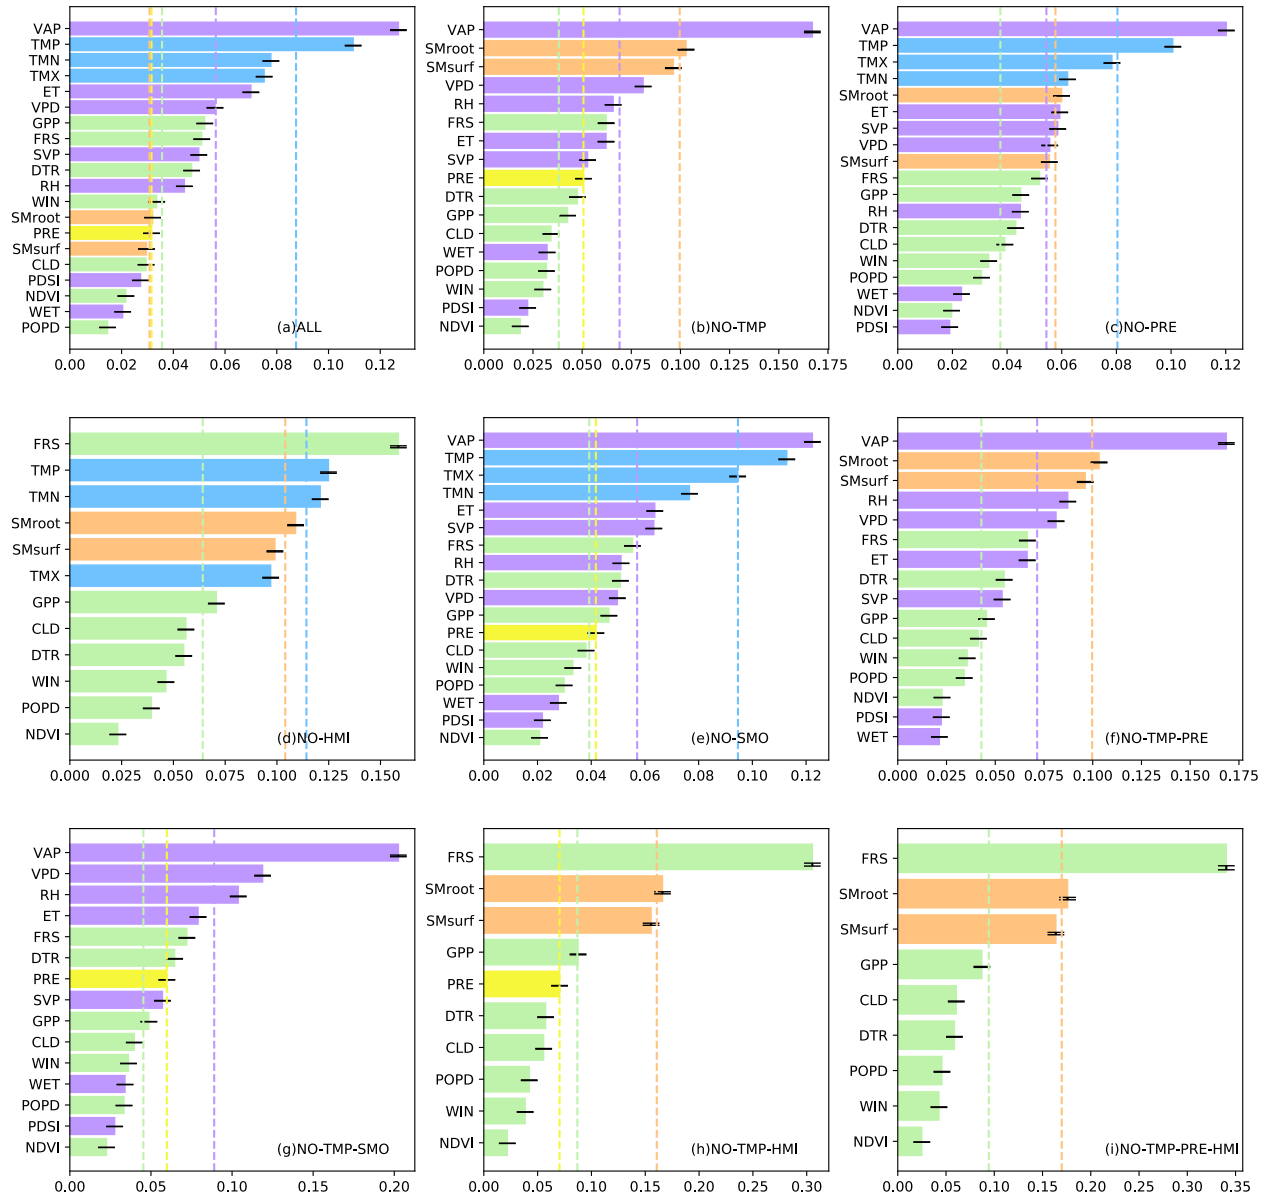

**Figure S15** The synthesized factor contribution importance ranking in a range of factor-control simulations: (a) include all factor, (b) exclude features in the temperature group (marked in blue), (c) exclude features in Precipitation group (yellow), (c) exclude air-dryness group (pink), (e) exclude soil moisture group (orange), (f) exclude both temperature and precipitation, (g) exclude temperature and soil moisture, (h) excludes temperature and air-dryness, and (i) exclude temperature, precipitation, and air dryness, where the vertical lines are the mean importance of grouped features with the same color.

## S6. Spatial Validation on Predicted Fire Impact Sizes

In this section, we validated the spatial distribution of predicted fire sizes either burned area or C emission from the testing stage, with multiple fire datasets. These datasets include FireCCI BA, GFED BA, and GFED C emission.

### S6.1 FireCCI burned area

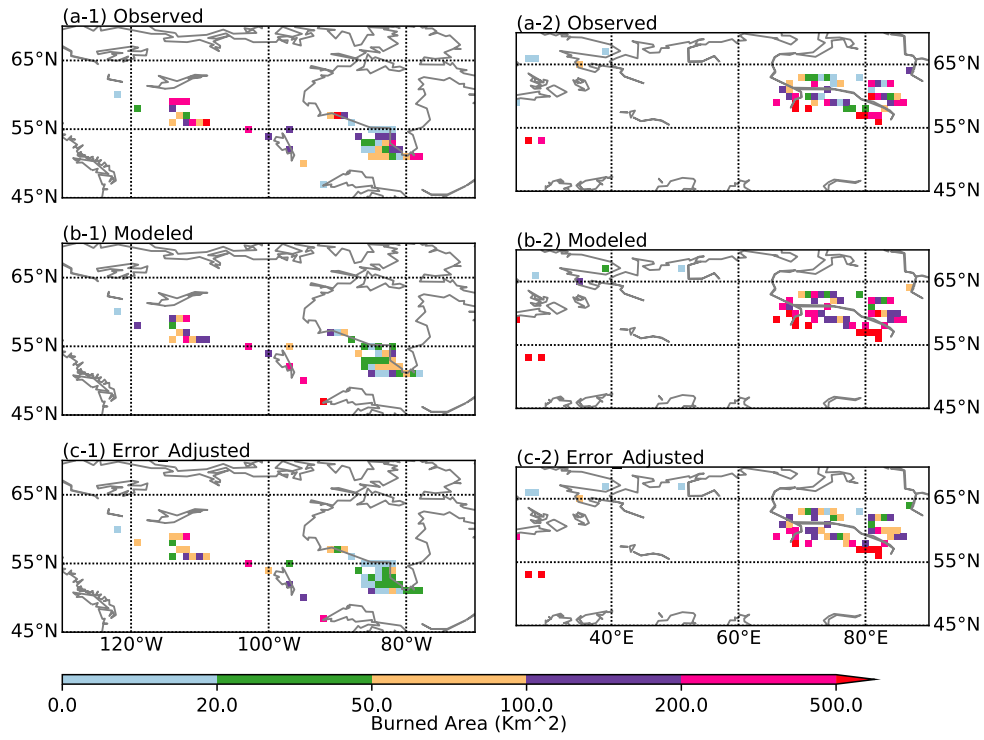

**Figure S16 Spatial validation of observed, stacked machine learning predicted, and the error-adjusted burned area magnitudes, based on FireCCI burned area dataset. Subfigures in column (x-1) and (x-2) represent the data/results at Hudson Bay area (x-1) and west Siberian (x-2), respectively, where x stands for (a) observations, (b) stacked model predictions, and (c) model prediction with error-correction.**

## S6.2 GFED BA

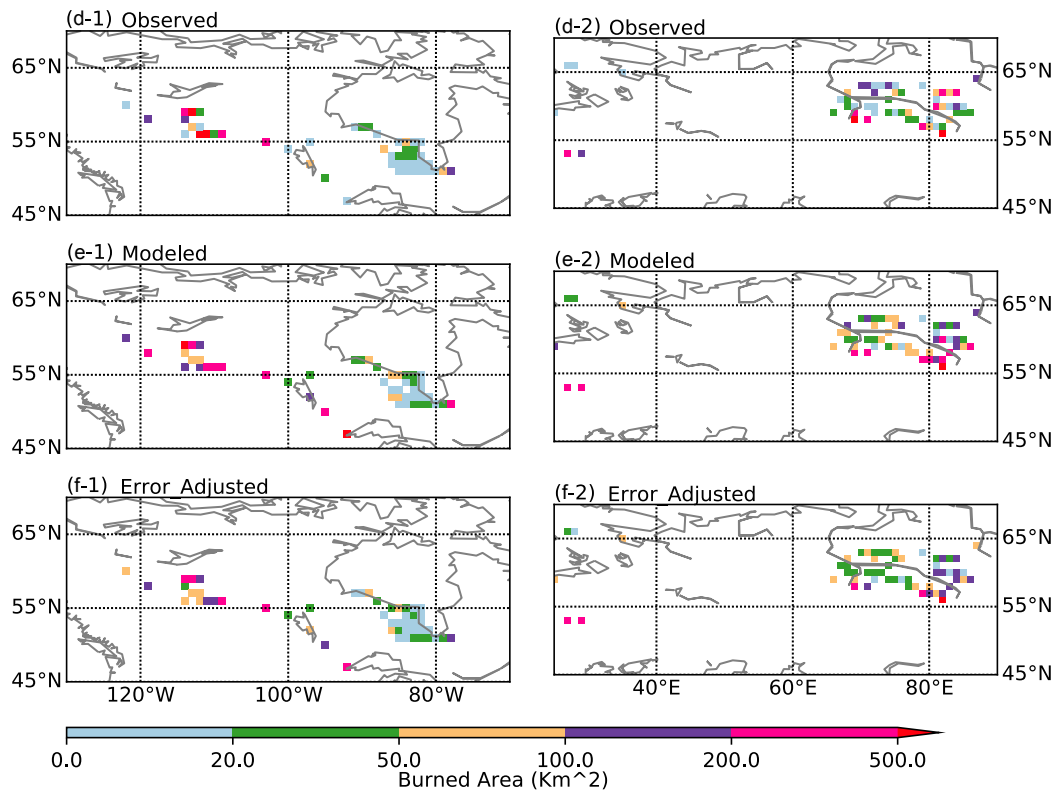

**Figure S17 Spatial validation of observed, stacked machine learning predicted, and the error-adjusted burned area magnitudes, based on GFED burned area dataset. Subfigures in column (x-1) and (x-2) represent the data/results at Hudson Bay area (x-1) and west Siberian (x-2), respectively, where x stands for (a) observations, (b) stacked model predictions, and (c) model prediction with error-correction.**

### S6.3 GFED C emission

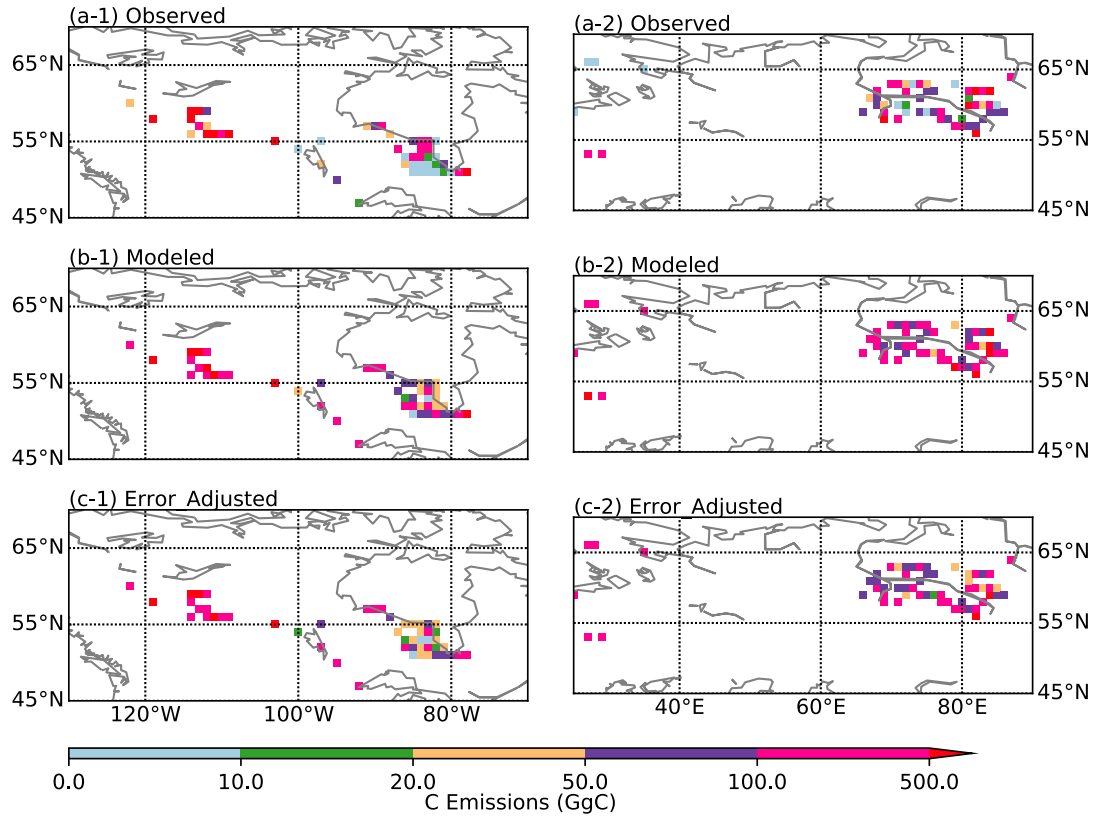

Figure S18 Spatial validation of observed, stacked machine learning predicted, and the error-adjusted burned area magnitudes, based on FireCCI burned area dataset. Subfigures in column (x-1) and (x-2) represent the data/results at Hudson Bay area (x-1) and west Siberian (x-2), respectively, where x stands for (a) observations, (b) stacked model predictions, and (c) model prediction with error-correction.

### S7. Temporal Validation of Predicted Fire Impact Sizes

In this section, we validated the temporal distribution of predicted fire size, either burned area or C emission, at the testing stage with multiple fire datasets. These datasets include FireCCI BA, GFED BA, and GFED C emission.

### S7.1 FireCCI burned area

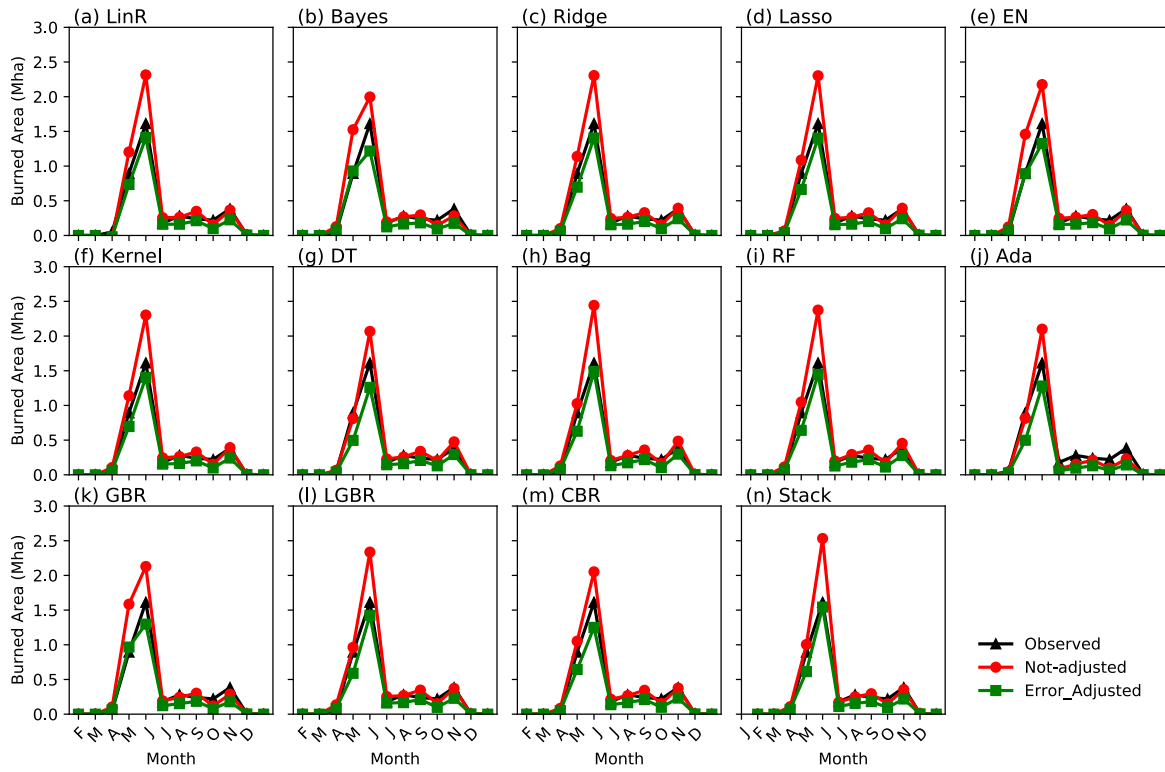

Figure S19 Seasonality of the observed, modelled, and error adjusted FireCCI burned area from multiple machine learning learners: (a) Linear Regression; (b) Bayesian linear Regression; (c) Ridge regression; (d) Lasso regression; (e) Elastic Net; (f) Kernel ridge regression; (g) Decision tree; (h) Bagging; (i) Random forests; (j) Adaptive boosting regression; (k) Gradient boosting regression; (l) Light gradient boosting regression; (m) Cat boosting regression; and (n) stacking.



S7.2 GFED BA

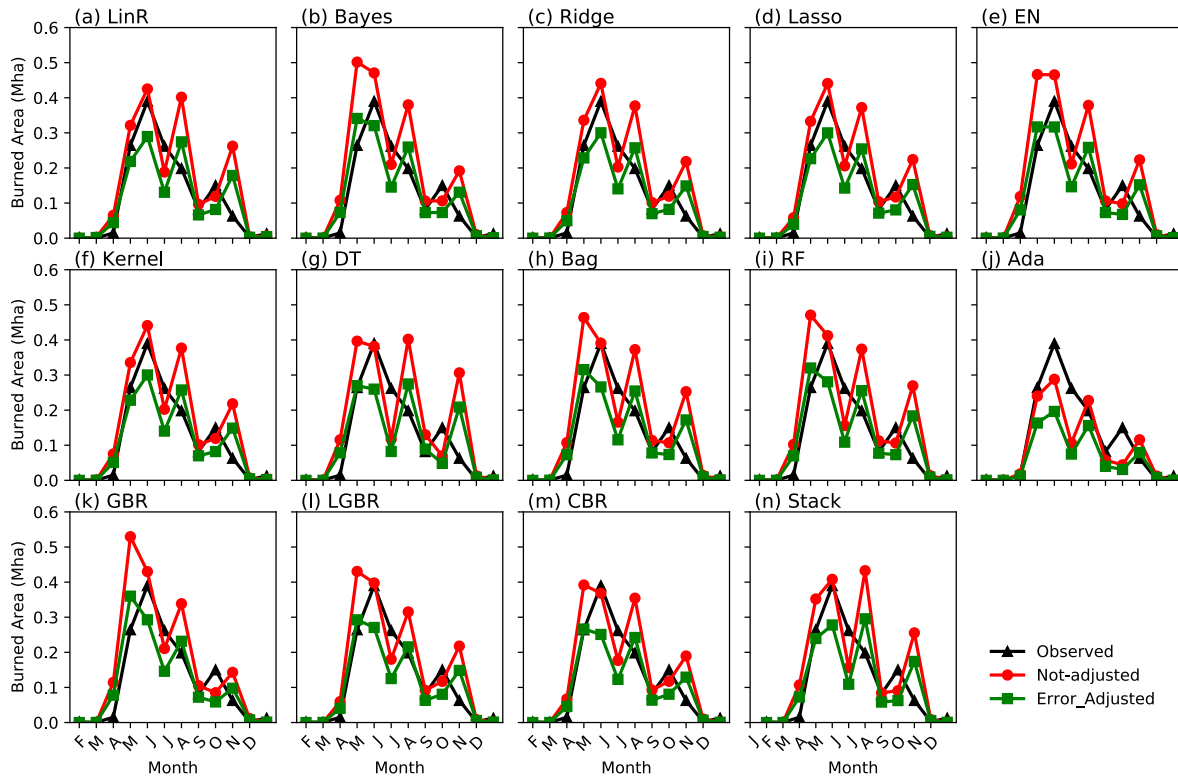

Figure S20 Seasonality of the observed, modelled, and error adjusted GFED burned area from multiple machine learning learners: (a) Linear Regression; (b) Bayesian linear Regression; (c) Ridge regression; (d) Lasso regression; (e) Elastic Net; (f) Kernel ridge regression; (g) Decision tree; (h) Bagging; (i) Random forests; (j) Adaptive boosting regression; (k) Gradient boosting regression; (l) Light gradient boosting regression; (m) Cat boosting regression; and (n) stacking.

### S7.3 GFED C emission prediction in testing set

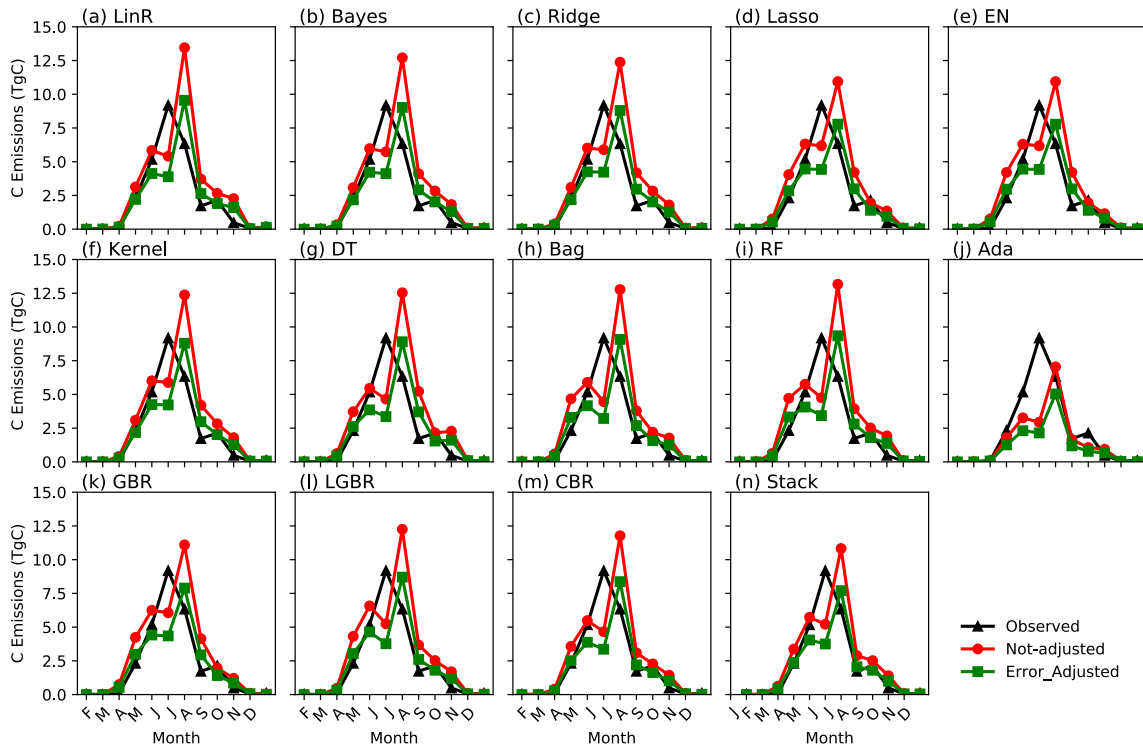

Figure S21 Seasonality of the observed, modelled, and error adjusted GFED C emission from multiple machine learning learners: (a) Linear Regression; (b) Bayesian linear Regression; (c) Ridge regression; (d) Lasso regression; (e) Elastic Net; (f) Kernel ridge regression; (g) Decision tree; (h) Bagging; (i) Random forests; (j) Adaptive boosting regression; (k) Gradient boosting regression; (l) Light gradient boosting regression; (m) Cat boosting regression; and (n) stacking.

### S8. Evaluation on the Error-correcting Effects

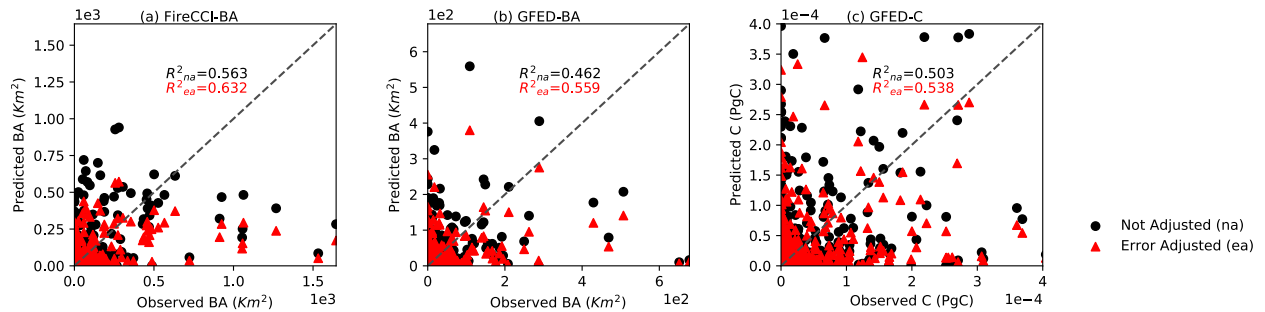

Figure S22 The scatter plots of observed and model predicted fire sizes. Model predictions—both error-adjusted (red triangle) and not-adjusted (black dot) predictions—are presented for (a) FireCCI burned area, (b) GFED burned area, and (c) GFED C emissions. The  $R^2_{na}$  and  $R^2_{ea}$  refer to the determination coefficients that without and with error adjustments, respectively.

## References

- Chuvieco, E., Pettinari, M. L., Lizundia-Loiola, J., Storm, T., and Padilla Parellada, M.: ESA Fire Climate Change Initiative Fire\_cci: MODIS Fire\_cci Burned Area Pixel product, version 5.13.1, <https://doi.org/10.5285/58F00D8814064B79A0C49662AD3AF537>, 2018.
- Gelaro, R., McCarty, W., Suárez, M. J., Todling, R., Molod, A., Takacs, L., Randles, C. A., Darmenov, A., Bosilovich, M. G., Reichle, R., Wargan, K., Coy, L., Cullather, R., Draper, C., Akella, S., Buchard, V., Conaty, A., da Silva, A. M., Gu, W., Kim, G.-K., Koster, R., Lucchesi, R., Merkova, D., Nielsen, J. E., Partyka, G., Pawson, S., Putman, W., Rienecker, M., Schubert, S. D., Sienkiewicz, M., and Zhao, B.: The Modern-Era Retrospective Analysis for Research and Applications, Version 2MERRA-2, *J. Climate*, 30, 5419–5454, <https://doi.org/10.1175/JCLI-D-16-0758.1>, 2017.
- Giglio, L., Boschetti, L., Roy, D. P., Humber, M. L., and Justice, C. O.: The Collection 6 MODIS burned area mapping algorithm and product, *Remote Sensing of Environment*, 217, 72–85, <https://doi.org/10.1016/j.rse.2018.08.005>, 2018.
- Harris, I., Osborn, T. J., Jones, P., and Lister, D.: Version 4 of the CRU TS monthly high-resolution gridded multivariate climate dataset, *Sci Data*, 7, 109, <https://doi.org/10.1038/s41597-020-0453-3>, 2020.
- Hugelius, G., Loisel, J., Chadburn, S., Jackson, R. B., Jones, M., MacDonald, G., Marushchak, M., Olefeldt, D., Packalen, M., Siewert, M. B., Treat, C., Turetsky, M., Voigt, C., and Yu, Z.: Large stocks of peatland carbon and nitrogen are vulnerable to permafrost thaw, *PNAS*, 117, 20438–20446, <https://doi.org/10.1073/pnas.1916387117>, 2020.
- Klein Goldewijk, K., Beusen, A., Doelman, J., and Stehfest, E.: Anthropogenic land use estimates for the Holocene – HYDE 3.2, *Earth System Science Data*, 9, 927–953, <https://doi.org/10.5194/essd-9-927-2017>, 2017.
- Madani, N. and Parazoo, N. C.: Global Monthly GPP from an Improved Light Use Efficiency Model, 1982–2016, ORNL DAAC, <https://doi.org/10.3334/ORNLDAAAC/1789>, 2020.
- Martens, B., Miralles, D. G., Lievens, H., van der Schalie, R., de Jeu, R. A. M., Fernández-Prieto, D., Beck, H. E., Dorigo, W. A., and Verhoest, N. E. C.: GLEAM v3: satellite-based land evaporation and root-zone soil moisture, *Geoscientific Model Development*, 10, 1903–1925, <https://doi.org/10.5194/gmd-10-1903-2017>, 2017.
- Pinzon, J. E. and Tucker, C. J.: A non-stationary 1981–2012 AVHRR NDVI3g time series, *Remote Sensing*, 6, 6929–6960, <https://doi.org/10.3390/rs6086929>, 2014.
- Randerson, J. T., Van der Werf, G. R., Giglio, L., Collatz, G. J., and Kasibhatla, P. S.: Global Fire Emissions Database, Version 4.1GFEDv4, ORNL DAAC, 2015.
- Roy, D. P., Boschetti, L., Justice, C. O., and Ju, J.: The collection 5 MODIS burned area product — Global evaluation by comparison with the MODIS active fire product, *Remote Sensing of Environment*, 112, 3690–3707, <https://doi.org/10.1016/j.rse.2008.05.013>, 2008.
- World Meteorological Organization: Guide to meteorological instruments and methods of observation, Secretariat of the World Meteorological Organization, 2008.
